# Supplementary material for: A stable enol from a 6-substituted benzanthrone and its unexpected behaviour under acidic conditions
Source: PubMed Central journal article supplement (PMC2707016; doi:10.3762/bjoc.5.31), 2009-06-16

## *Supporting Information*

# **A stable enol from a 6-substituted benzanthrone and its unexpected behaviour under acidic conditions**

Marc Debeaux<sup>1</sup>, Kai Brandhorst<sup>2</sup>, Peter G. Jones<sup>3</sup>, Henning Hopf<sup>2</sup>, Jörg Grunenberg<sup>2</sup>, Wolfgang Kowalsky<sup>1</sup> and Hans-Hermann Johannes<sup>\*1</sup>

<sup>1</sup> Labor für Elektrooptik am Institut für Hochfrequenztechnik, Technische Universität Braunschweig, Bienroder Weg 94, 38106 Braunschweig, Germany and

<sup>2</sup> Institut für Organische Chemie, Technische Universität Braunschweig, Hagenring 30, 38106 Braunschweig, Germany and

<sup>3</sup> Institut für Anorganische und Analytische Chemie, Technische Universität Braunschweig, Hagenring 30, 38106 Braunschweig, Germany

Email: Hans-Hermann Johannes – [h2.johannes@ihf.tu-bs.de](mailto:h2.johannes@ihf.tu-bs.de)

\* Corresponding author

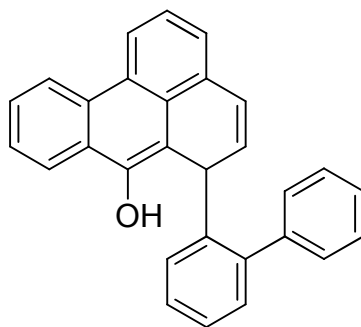

**4**

*<sup>1</sup>H NMR (400 MHz, d<sub>6</sub>-DMSO):*

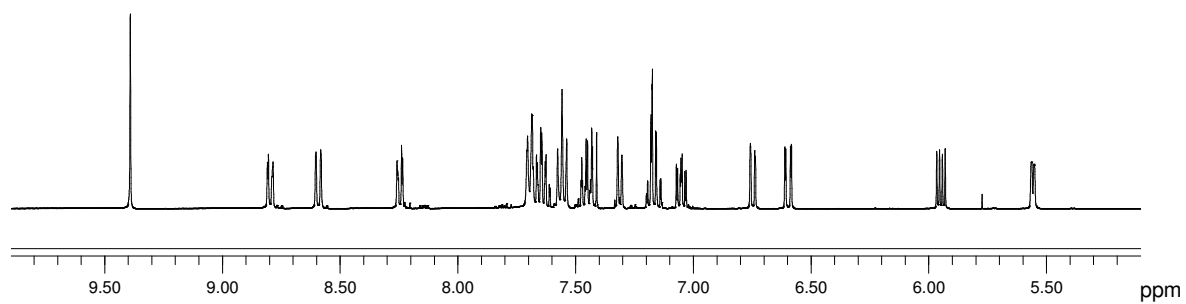

*<sup>13</sup>C NMR (101 MHz, d<sub>6</sub>-DMSO):*

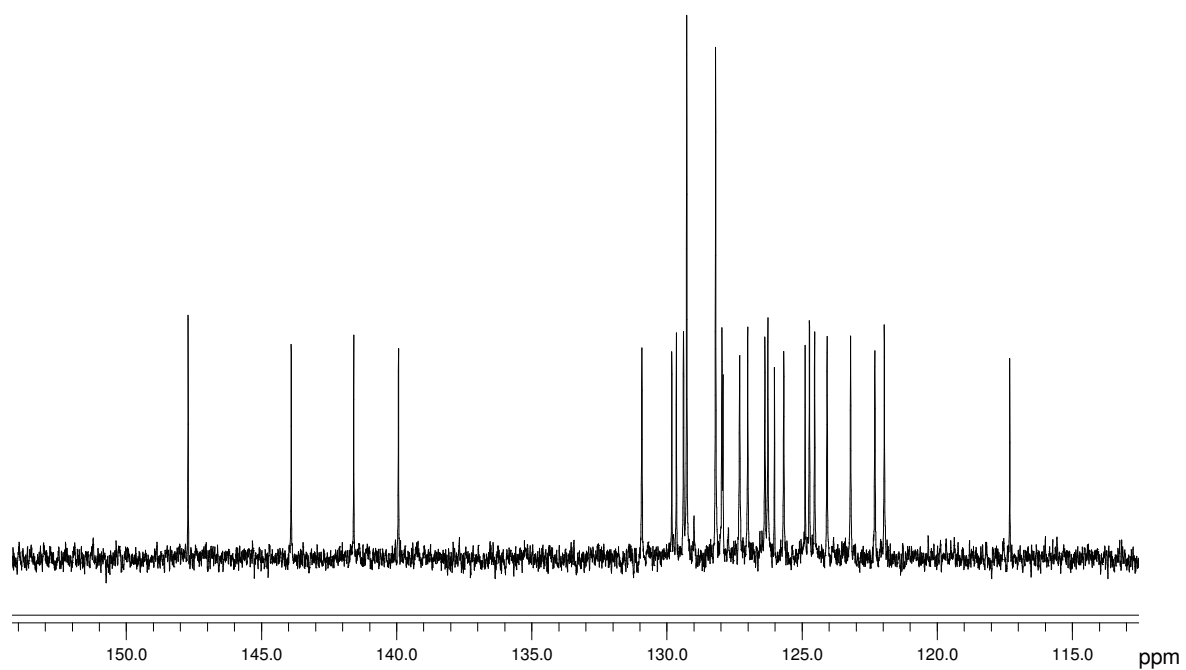

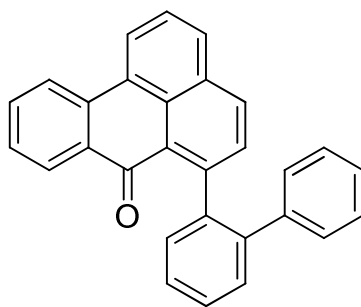

**7**

*<sup>1</sup>H NMR (400 MHz, CDCl<sub>3</sub>):*

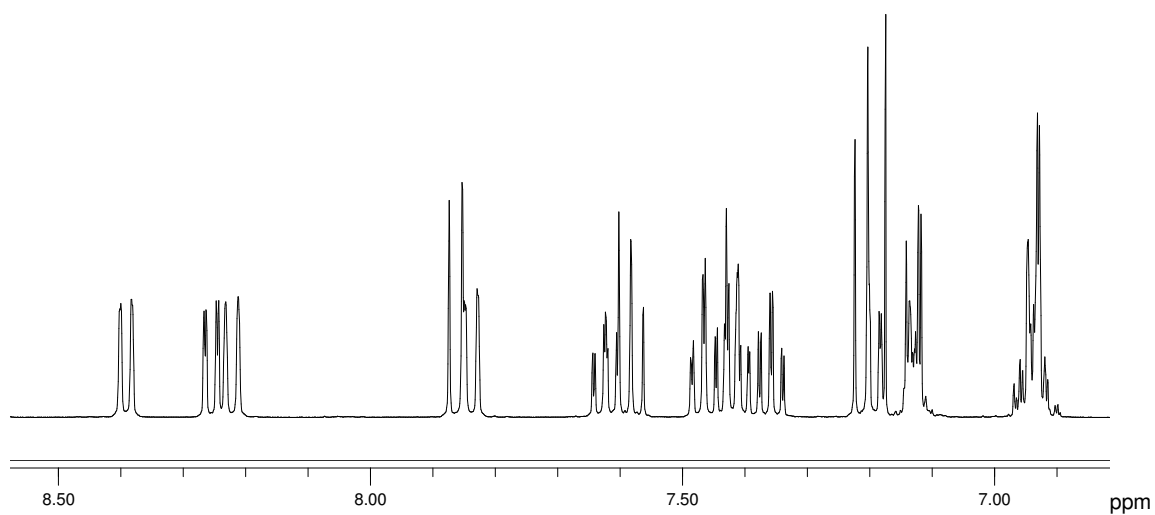

*<sup>13</sup>C NMR (101 MHz, CDCl<sub>3</sub>):*

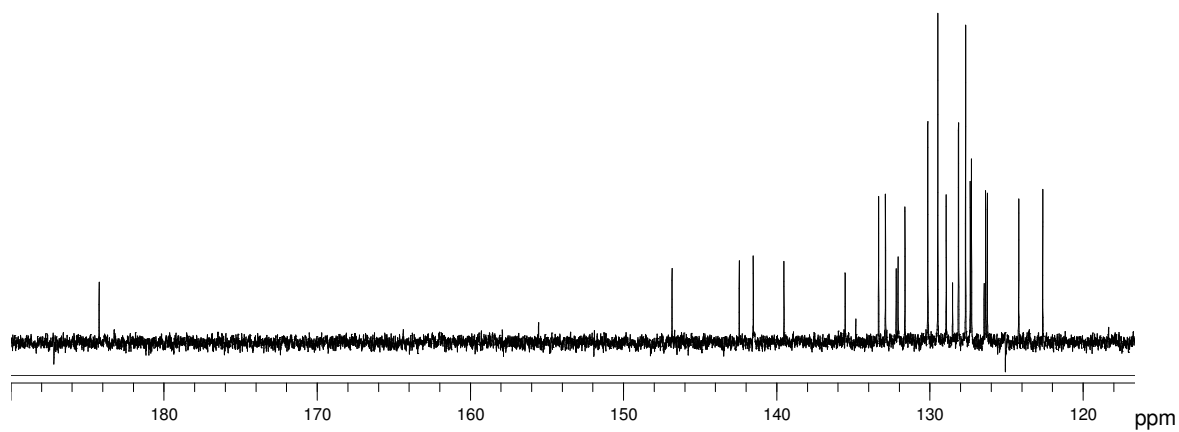

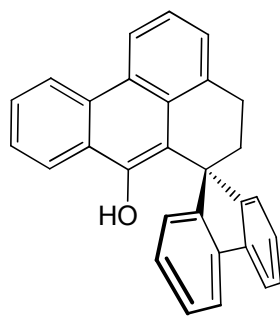

**10**

$^1\text{H NMR}$  (600 MHz,  $\text{CDCl}_3$ ):

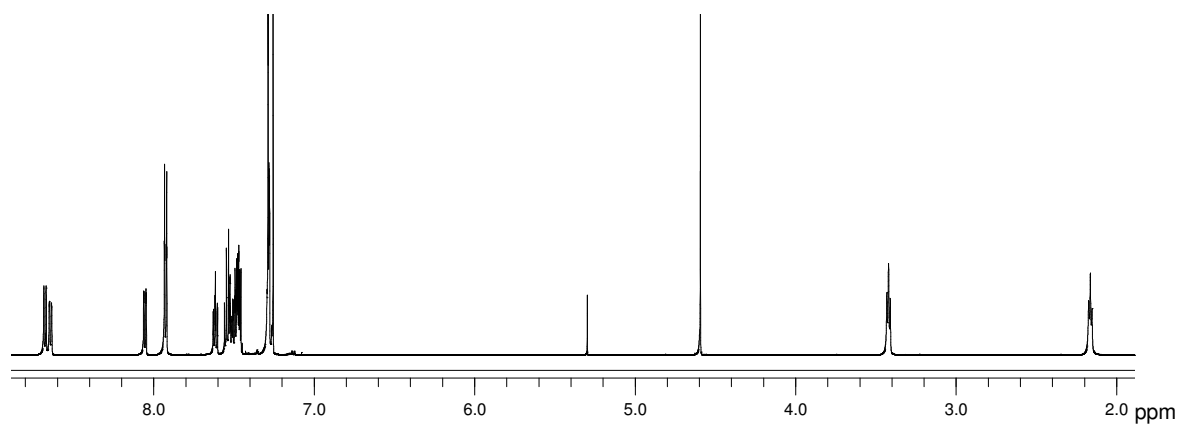

$^{13}\text{C NMR}$  (151 MHz,  $\text{CDCl}_3$ ):

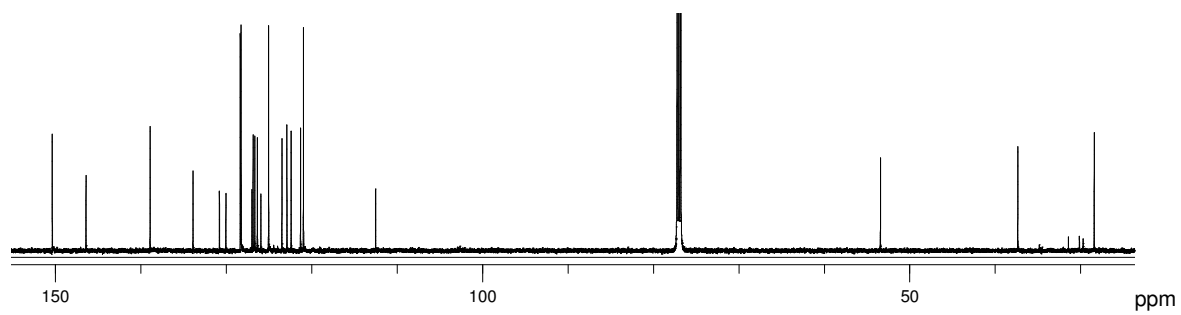

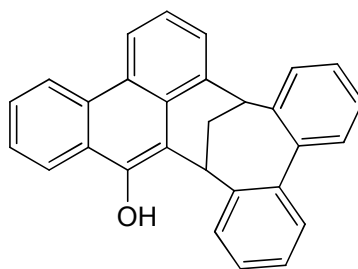

**11**

*<sup>1</sup>H NMR (400 MHz, CDCl<sub>3</sub>):*

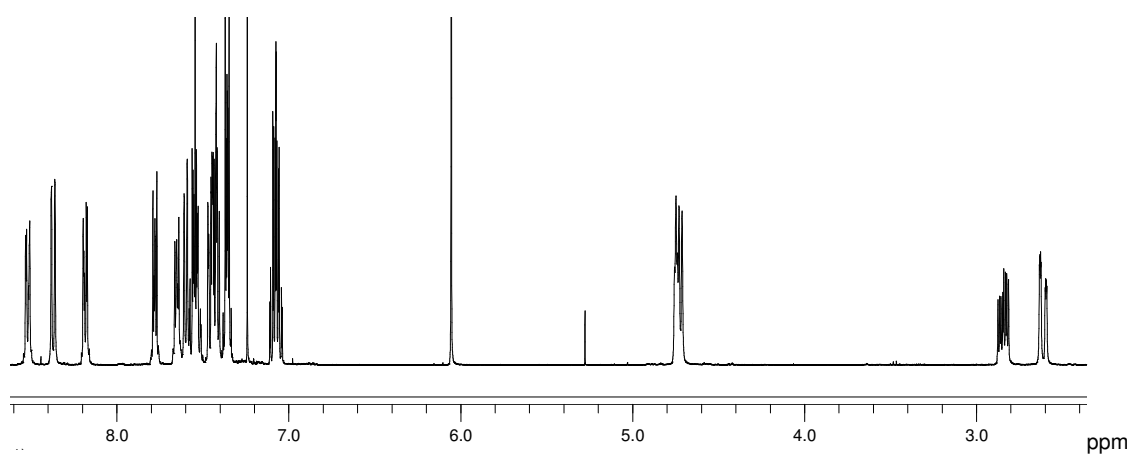

*<sup>13</sup>C NMR (101 MHz, CDCl<sub>3</sub>):*

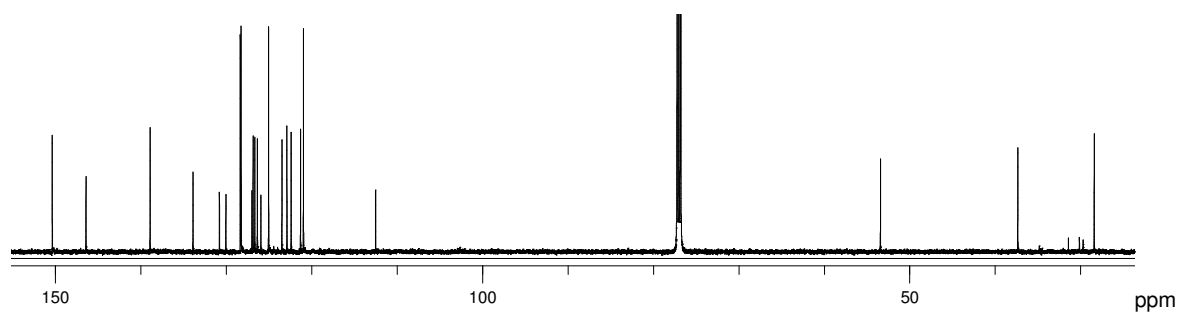

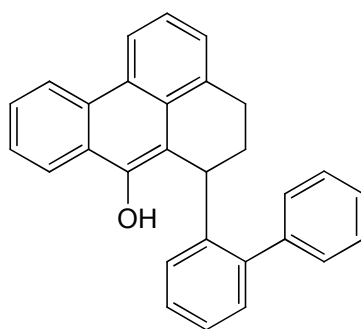

**12**

*<sup>1</sup>H NMR (400 MHz, d<sub>6</sub>-DMSO):*

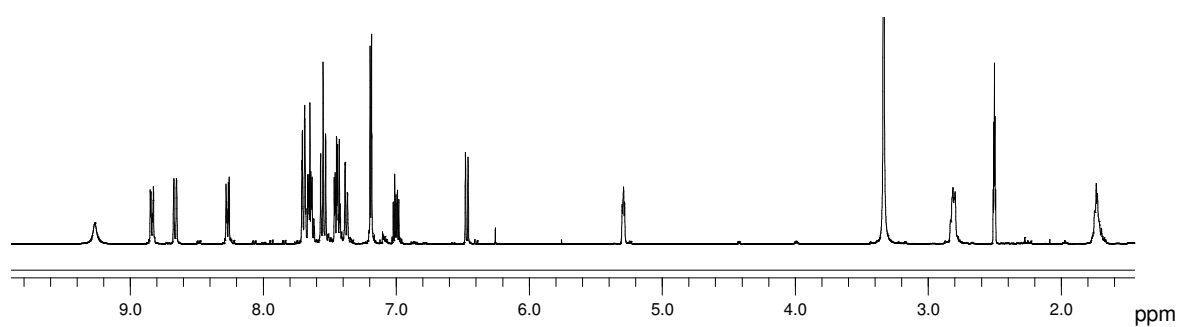

*<sup>13</sup>C NMR (101 MHz, d<sub>6</sub>-DMSO):*

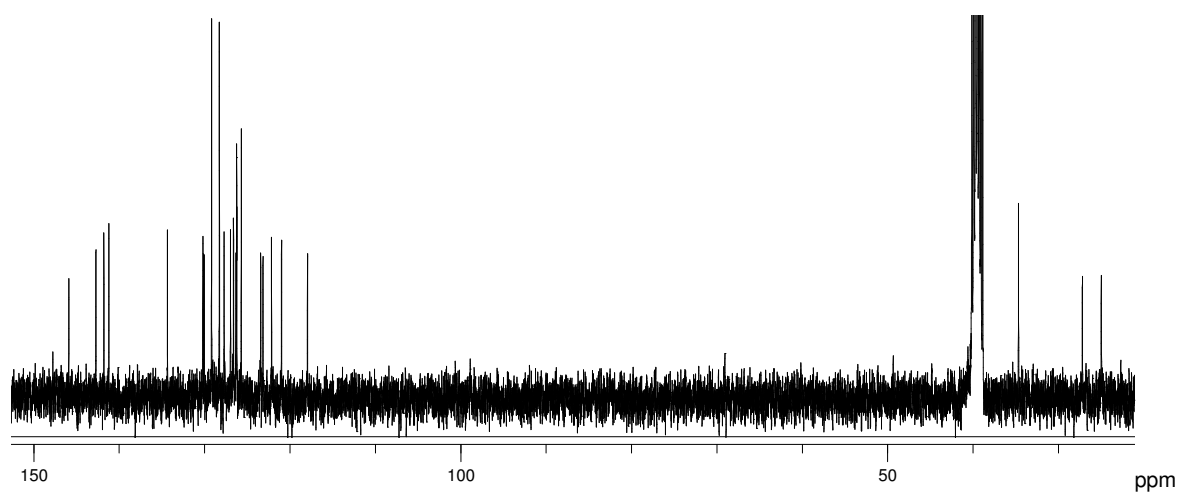

Supplement: Beilstein_J_Org_Chem-05-31-s001.pdf [file Beilstein_J_Org_Chem-05-31-s001.pdf]
